# Supplementary material for: Light-Regulated Transcription of a Mitochondrial-Targeted K+ Channel
Source: MDPI journal article supplement (doi:10.3390/cells9112507), 2020-11-19
Supplement: s1 [file s1]

## Supplementary Figures

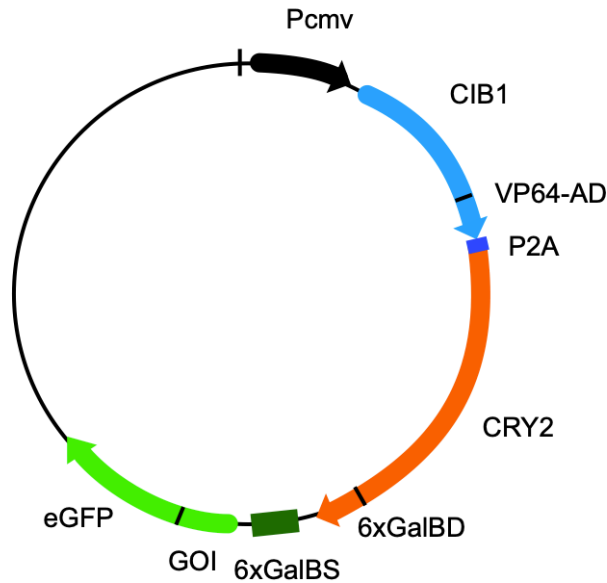

**Figure S1. Organization of unified vector.** The vector includes a CMV promotor (Pcmv), a fusion of CIB1 with the VP64 activation domain and CRY2 separated by a self-cleaving P2A sequence. The pGL2-Gal4-GOI which codes for the GOI which is fused to a 6xGalBS and has an c-terminal eGFP-tag.

**A**

|                |                                                                  |    |
|----------------|------------------------------------------------------------------|----|
| <b>Kmpv12T</b> | -----MRNLIIISTLFGIIY----S                                        | 17 |
| <b>Kesv</b>    | MSRRLFATCGIAIALRGLVVS GG VKEIVSFRPLIDTSLVGGILSNLIL-LVVFAELYWQLDQ | 61 |
|                | : ***: .:*. :*                                                   |    |

|                |                                                                          |     |
|----------------|--------------------------------------------------------------------------|-----|
| <b>Kmpv12T</b> | SLEPGHFQFKSVLDPFYFSFT <b>TSSSVGYG</b> DITPKTNLAKVLVMCQQLLFNELMQ-VAKMIKY  | 78  |
| <b>Kesv</b>    | GDDHTHFGFSSAIDAYYFSAV <b>TSSSVGYG</b> DLLPKTPKAKLLTIAHILAMFFVMLPVVAKALEK | 124 |
|                | . : ** *.*: :*** . * *****: *** **:*.:.: :* :: *** ::                    |     |

**B**

**Kesv**

ATGAGCAGACGGCTGTTTCGCCACCTGTGGAATCGCCATTGCCCTGCGGGGCTGGTGGTGTCTGGCGGCGTGAAA  
 GAAATCGTGCTCCTTCGGCCCCCTGATCGACACCAGCCTCGTGGGAGGCATCCTGAGCAACCTGATCCTGCTGGTG  
 GTGTTTCGCCGAGCTGTACTGGCAGCTGGACCAGGGCGACGACCACACCCACTTCGGCTTCAGCAGCGCCATCGAC  
 GCCTACTACTTCAGCGCCGTGACCAGCAGCAGCGTGGGCTACGGCGACCTGCTGCCCAAGACCCCCAAGGCCAAG  
 CTGCTGACAATCGCCACATCCTGGCCATGTTCTTCGTGATGCTGCCCCGTGGTGGCCAAGGCCCTGGAAAAGG

**Kmpv<sub>12T</sub>**

ATGCGGAACCTGATCATCATCAGCACCTGTTTCGGCATCATCTACAGCAGCCTGGAACCTGGCCACTTCCAGTTC  
 AAGAGCGTGCTGGACCCCTTCTACTTCAGCTTCACCACCATGAGCAGCGTCGGCTACGGCGACATCACCCCTAAG  
 ACCAATCTGGCCAAGGTGCTGGTCATGTGCCAGCAGAGCCTGCTGTTCAACGAGCTGATGCAGGTGCGCAAGATG  
 ATCAAGTAC

**Figure S2: Sequences of viral K<sup>+</sup> channels.** Two viral encoded proteins with hallmarks of K<sup>+</sup> channels. **(A)** Alignment of amino acid sequences of Kesv and Kmpv<sub>12T</sub>. The typical sequence of the selectivity filter is highlighted in red. **(B)** Sequences of codon optimized genes of both proteins.

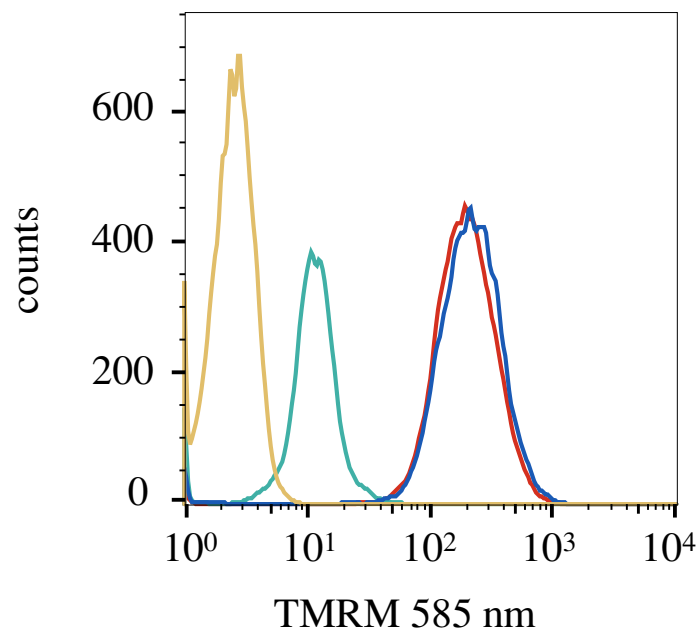

**Fig. S3: Kesv does not depolarize mitochondrial membrane potential.**

Spectra of unstained HEK293 cells (yellow) and TMRM stained un-transfected control cells (blue) and cells expressing Kesv without (red) or with 100  $\mu$ M CCCP (green).

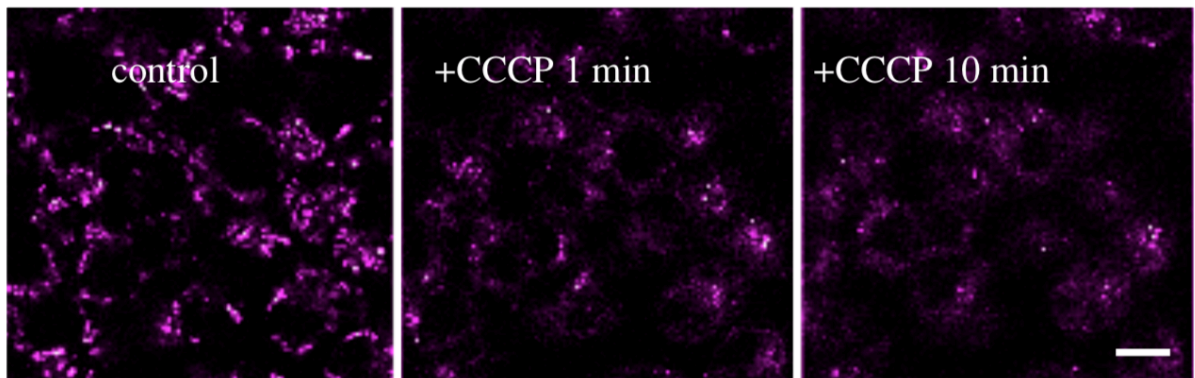

**Figure S4: Uncoupler CCCP causes a decrease in MitoTracker CMXRos fluorescence.**

HEK293 cells were stained with voltage sensitive mitotracker dye CMXRos, which resulted in bright fluorescence of mitochondria (left panel). Addition of 100  $\mu$ M CCCP to buffer resulted in strong decrease in CMXRos fluorescence 1 min and 10 min after addition of uncoupler. The effect of the uncoupler can be quantified from the ratio of red fluorescence from cells in CCCP ( $RFI_{+CCCP}$ ) divided by fluorescence from the same cells prior to CCCP treatment ( $RFI_{-CCCP}$ ).

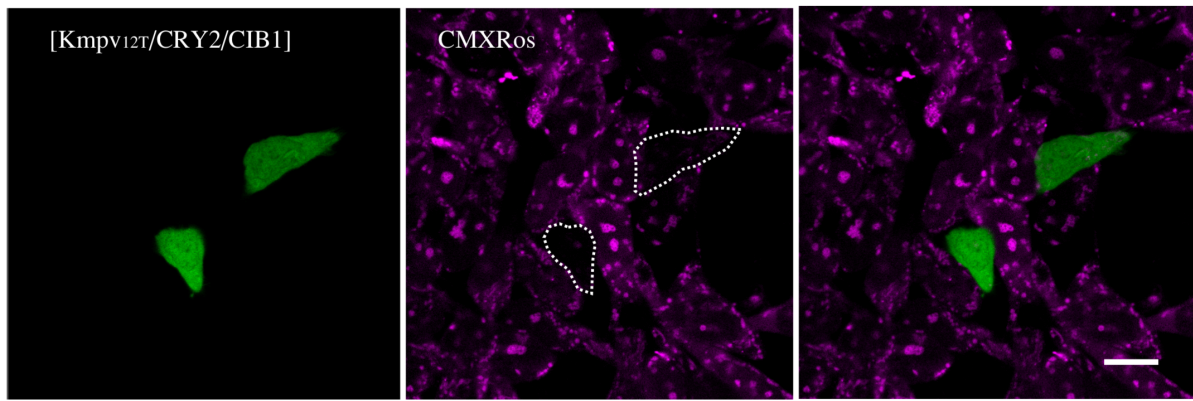

**Figure S5: Also Kmpv<sub>12T</sub> with no distinct mitochondrial sorting causes depolarization of mitochondria.** Fluorescent images of HEK293 cells expressing [Kmpv<sub>12T</sub>/CRY2/CIB1] with GFP throughout entire cell (left panel) and MitoTracker CMXRos (2<sup>nd</sup> column A). Overlays of green and CMXRos fluorescence are reported in third column. The contours of GFP positive cells in red channels are indicated by dashed lines. The red fluorescence in the GFP positive cells is lower than in the adjacent non transfected cells. Cells were incubated for 16 hours and illuminated with a single 1-minute light pulse of 6  $\mu$ mol 4 hours prior to imaging.

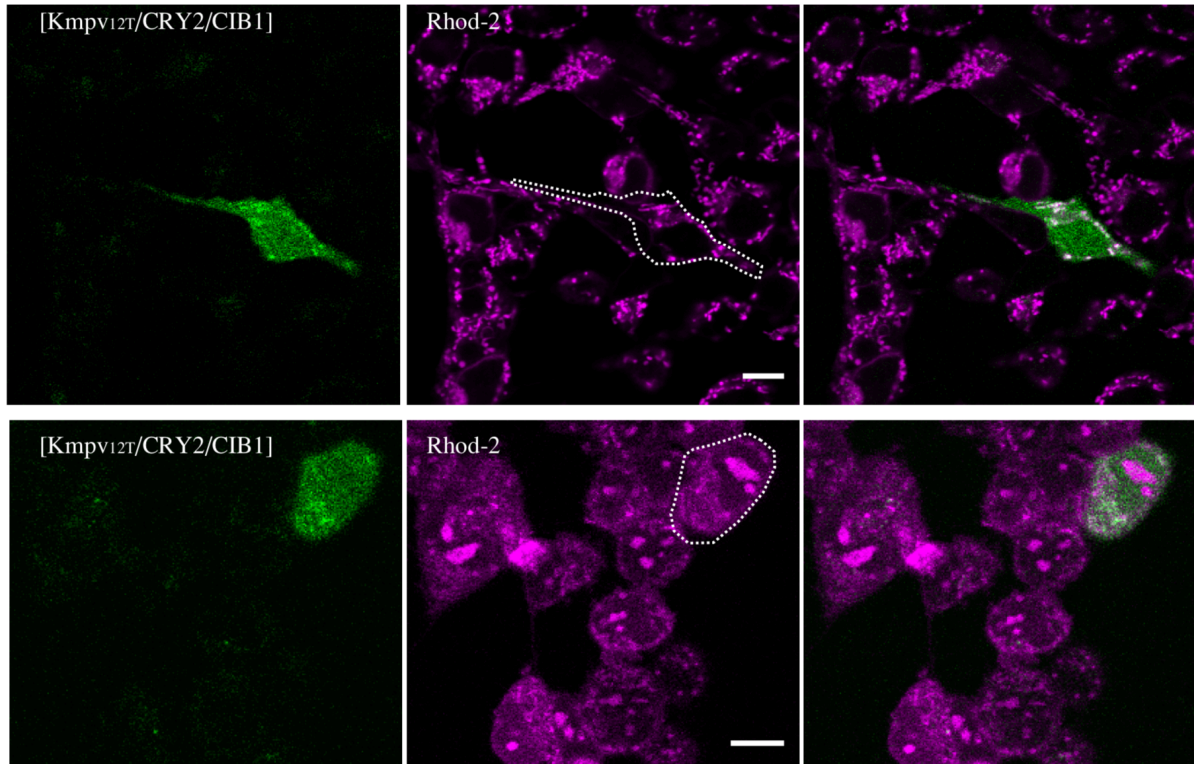

**Figure S6: Expression of [Kmpv<sub>12T</sub>/CRY2/CIB1] in the dark does not affect fluorescence of voltage sensor CMXRos or Ca<sup>2+</sup> sensor Rhod-2.** Fluorescent images of HEK293 cells expressing GFP tagged CRY-Kmpv<sub>12T</sub> (1<sup>st</sup> column) and stained (2<sup>nd</sup> column) with MitoTracker CMXRos (top row) or Rhod-2 (bottom row) and overlay of GFP with CMXRos or Rhod-2 fluorescence (3<sup>rd</sup> column). The contours of GFP positive cells in red channels are indicated by dashed lines. The GFP signal is very low because Kmpv<sub>12T</sub> expression was under control of CRY2/CIB1 system and cells were kept in the dark. In the latter case cells were incubated for 20 hours in dark prior to imaging. Calibration bars= 10  $\mu$ m.
